# Supplementary material for: Standardized Fraction of Turbinaria ornata Alleviates Dextran Sulfate Sodium-Induced Chronic Colitis in C57BL/6 Mice via Upregulation of FOXP3+ Regulatory T Cells
Source: PubMed Central journal article supplement (PMC7590162; doi:10.3390/biom10101463), 2020-10-20
Supplement: biomolecules-10-01463-s001.pdf [file biomolecules-10-01463-s001.pdf]

## **The standardized fraction of *Turbinaria ornata* alleviates dextran sulfate sodium-induced chronic colitis in C57BL/6 mice via upregulation of Foxp3+ T cell response**

**Na-Hyun Kim<sup>1</sup>, Seon Min Lee<sup>1</sup>, Yun Na Kim<sup>2</sup>, You-Jin Jeon<sup>3</sup>, Jeong Doo Heo<sup>1</sup>, Eun Ju Jeong<sup>2\*</sup> and Jung-Rae Rho<sup>4\*</sup>**

<sup>1</sup>Gyeongnam Department of Environment & Toxicology, Korea Institute of Toxicology, 17 Jegok-gil, Munsan-eup 5834, Republic of Korea; nhkim@kitox.re.kr (N.-H.K.); smlee84@kitox.re.kr (S.M.L.); jdher@kitox.re.kr (J.D.H.)

<sup>2</sup>Department of Agronomy and Medicinal Plant Resources, Gyeongnam National University of Science and Technology, Jinju 52725, Republic of Korea; skdbask@hanmail.net (Y.N.K.); ejjeong@gntech.ac.kr (E.J.J.)

<sup>3</sup>Department of Marine Life Sciences, Jechu National University, Jeju 690-756, Republic of Korea; youjin2014@gmail.com

<sup>4</sup>Department of Oceanography, Kunsan National University, Kunsan 54150, Republic of Korea; jrrho@kunsan.ac.kr

\*Correspondence: ejjeong@gntech.ac.kr (E.J.J.); jrrho@kunsan.ac.kr (J.-R. R); Tel.: +82-55-751-3224 (E.J.J.); +82-463-69-4606 (J.-R.R.)

S1. Inhibitory activities of fractions M1~M4 of *T. ornata* extract on nitric oxide and inflammatory cytokines in LPS-activated RAW264.7 cells.

| Fractions | Conc.<br>(ug/ml) | Relative % of control |              |       |       |
|-----------|------------------|-----------------------|--------------|-------|-------|
|           |                  | Nitric Oxide          | IL-1 $\beta$ | IL-10 | IL-6  |
| M1        | 20               | 97.1                  | 99.8         | 85.5  | 89.5  |
| M2        | 20               | 27.2                  | 99.9         | 1.10  | 56.7  |
| M3        | 20               | 44.3                  | 88.3         | 1.12  | 102.4 |
| M4        | 20               | 95.5                  | 98.8         | 90.0  | 99.5  |

## S2. Primer sequences for RT-qPCR

TNF- $\alpha$ ; 5'-tatggctcagggccaactc-3', 5'-ctcccttgcaactcagg-3',  
IL-17; 5'-ttcagggcgcagaagatgct-3', 5'-aaactgggggttcttagg-3',  
IL-10; 5'-ccaggagatccttgatga-3', 5'-aactggccacagtttcagg-3',  
IL-4; 5'-ggctcaacccccagctagt-3', 5'-gccgatgatctctcaagtgat-3',  
IL-6; 5'-gttctctgggaaatcgtgga-3', 5'-tgtactccaggtagcta-3',  
IFN- $\gamma$ ; 5'-gcgctattgaatcacacctg-3', 5'-tgagctcattgaatgcttg-3',  
CD3; 5'-atcactctgggcttgctgat-3', 5'-tagtctgggttgggaacagg-3',  
Foxp3; 5'-tcttccaagctggaagact-3', 5'-ggggttcaaggaagaagg-3',  
ROR $\gamma$ t; 5'-gggatccactacgggttat-3', 5'-gtgcaggagtaggccacatt-3',  
GATA3; 5'-gtcatccctgagccacatct-3', 5'-agggctctgcctcttaacc-3',  
T-bet; 5'-cctggaccaactgtcaact-3', 5'-aactgtgtcccagggtgc-3',  
GAPDH; 5'-aactttggcattgtggaagg-3', 5'-ggatgcagggatgatgttct-3'
